# Supplementary material for: Computationally Modelling Cholesterol Metabolism and Atherosclerosis
Source: MDPI journal article supplement (doi:10.3390/biology12081133), 2023-08-14
Supplement: s1 [file s1]

$$\begin{aligned} \frac{d([IC] \cdot V_{Intestine})}{dt} &= +(1 \cdot [DC]) \\ &+ V_{Intestine} \cdot \left( \frac{""Rate Law for Intestinal Cholesterol Synthesis""(100, [IC], 3120, 5)}{V_{Intestine}} \right) \\ &- (0.0005286 \cdot [IC] \cdot [IBS]) \\ &- (0.0005286 \cdot [IC] \cdot [IBS]) \\ &+ \left( \frac{2000}{1 + \left( \frac{55326}{[HFC]} \right)^5} \right) \\ \frac{d([HBS] \cdot V_{HepaticTissue})}{dt} &= -(6 \cdot [HBS]) \\ &+ (4.29 \cdot [IBS]) \\ &+ V_{HepaticTissue} \cdot \left( \frac{""Rate Law for Bile Salt Synthesis""(2.66, [HFC], [HBS])}{V_{HepaticTissue}} \right) \\ \frac{d([IBS] \cdot V_{Intestine})}{dt} &= +(6 \cdot [HBS]) \\ &- (4.29 \cdot [IBS]) \\ &- (0.856 \cdot [IBS]) \\ \frac{d([HFC] \cdot V_{HepaticTissue})}{dt} &= + V_{HepaticTissue} \cdot \left( \frac{""Rate Law for Hepatic Cholesterol Synthesis""(500, [HFC], 93925, 5)}{V_{HepaticTissue}} \right) \\ &- V_{HepaticTissue} \cdot \left( \frac{""Rate Law for Hepatic Cholesterol Storage_1""(1, [ACAT], [HFC])}{V_{HepaticTissue}} \right) \\ &+ V_{HepaticTissue} \cdot \left( \frac{""Rate Law for Release of Stored Cholesterol""(5.998, [CEH], [HCE])}{V_{HepaticTissue}} \right) \\ &- (0.016 \cdot [HFC]) \\ &+ (0.0496 \cdot [VLDLC]) \\ &+ (0.054 \cdot [IDLCL]) \\ &+ (0.068 \cdot [LDLC] \cdot [HDLRs]) \\ &+ (0.005 \cdot [LDLC]) \\ &+ (0.05 \cdot [HDLC] \cdot [SRB1]) \\ &- V_{HepaticTissue} \cdot \left( \frac{""Rate Law for Bile Salt Synthesis""(2.66, [HFC], [HBS])}{V_{HepaticTissue}} \right) \\ &+ (0.0005286 \cdot [IC] \cdot [IBS]) \\ &- \left( \frac{2000}{1 + \left( \frac{55326}{[HFC]} \right)^5} \right) \\ \frac{d([NHDL] \cdot V_{Plasma})}{dt} &= +(0.005 \cdot [PFC]) \\ &- (1.5e-05 \cdot [PFC] \cdot [NHDL] \cdot [LCAT]) \\ &+ (0.0005 \cdot [PFC]) \\ \frac{d([PFC] \cdot V_{PeripheralTissue})}{dt} &= +(0.00675 \cdot [PLDLRs] \cdot [LDLC]) \\ &+ (5e-06 \cdot [LDLC]) \\ &- (0.017386 \cdot [ACAT] \cdot [PFC]) \\ &+ (0.1068 \cdot [CEH] \cdot [PCE]) \\ &- V_{PeripheralTissue} \cdot \left( \frac{0.0005 \cdot [PFC]}{V_{PeripheralTissue}} \right) \\ &- (1.5e-05 \cdot [PFC] \cdot [NHDL] \cdot [LCAT]) \\ &+ V_{PeripheralTissue} \cdot \left( \frac{""Rate Law for Peripheral Cholesterol Synthesis""(500, [PFC], 80342, 5)}{V_{PeripheralTissue}} \right) \\ \frac{d([HCE] \cdot V_{HepaticTissue})}{dt} &= + V_{HepaticTissue} \cdot \left( \frac{""Rate Law for Hepatic Cholesterol Storage_1""(1, [ACAT], [HFC])}{V_{HepaticTissue}} \right) \\ &- V_{HepaticTissue} \cdot \left( \frac{""Rate Law for Release of Stored Cholesterol""(5.998, [CEH], [HCE])}{V_{HepaticTissue}} \right) \\ \frac{d([VLDLC] \cdot V_{Plasma})}{dt} &= +(0.016 \cdot [HFC]) \\ &- (0.0496 \cdot [VLDLC]) \\ &- V_{Plasma} \cdot \left( \frac{""Rate Law for IDL Cholesterol Formation""(0.43, [VLDLC], [LPL])}{V_{Plasma}} \right) \\ &+ V_{Plasma} \cdot \left( \frac{""Rate Law for CETP Mediated Transfer To VLDL""(0.01, [HDLC], [CETP])}{V_{Plasma}} \right) \\ \frac{d([HDLRs] \cdot V_{HepaticTissue})}{dt} &= + V_{HepaticTissue} \cdot \left( \frac{""Rate Law for Hepatic LDLR Synthesis""(100, [HDLRsS], [HFC])}{V_{HepaticTissue}} \right) \\ &- V_{HepaticTissue} \cdot \left( \frac{0.01 \cdot [HDLRs]}{V_{HepaticTissue}} \right) \\ \frac{d([IDLCL] \cdot V_{Plasma})}{dt} &= + V_{Plasma} \cdot \left( \frac{""Rate Law for IDL Cholesterol Formation""(0.43, [VLDLC], [LPL])}{V_{Plasma}} \right) \\ &- (0.054 \cdot [IDLCL]) \\ &- V_{Plasma} \cdot \left( \frac{""Rate Law for LDL Cholesterol Formation""(0.38, [IDLCL], [HSL])}{V_{Plasma}} \right) \\ \frac{d([LDLC] \cdot V_{Plasma})}{dt} &= + V_{Plasma} \cdot \left( \frac{""Rate Law for LDL Cholesterol Formation""(0.38, [IDLCL], [HSL])}{V_{Plasma}} \right) \\ &- (0.068 \cdot [LDLC] \cdot [HDLRs]) \\ &- (0.005 \cdot [LDLC]) \\ &- (0.00675 \cdot [PLDLRs] \cdot [LDLC]) \\ &- (5e-06 \cdot [LDLC]) \\ &+ V_{Plasma} \cdot \left( \frac{""Rate Law for CETP Mediated TransferTo LDL""(0.001, [HDLC], [CETP])}{V_{Plasma}} \right) \\ &- V_{Endothelium} \cdot (KinLDL \cdot [LDLC] \cdot M) \\ \frac{d([PLDLRs] \cdot V_{PeripheralTissue})}{dt} &= + V_{PeripheralTissue} \cdot \left( \frac{""Rate Law for Peripheral LDLR Synthesis""(100, [PLDLRsS], [PFC])}{V_{PeripheralTissue}} \right) \\ &- V_{PeripheralTissue} \cdot \left( \frac{0.01 \cdot [PLDLRs]}{V_{PeripheralTissue}} \right) \\ \frac{d([PCE] \cdot V_{PeripheralTissue})}{dt} &= +(0.017386 \cdot [ACAT] \cdot [PFC]) \\ &- (0.1068 \cdot [CEH] \cdot [PCE]) \\ \frac{d([HDLC] \cdot V_{Plasma})}{dt} &= +(1.5e-05 \cdot [PFC] \cdot [NHDL] \cdot [LCAT]) \\ &- V_{Plasma} \cdot \left( \frac{""Rate Law for CETP Mediated Transfer To VLDL""(0.01, [HDLC], [CETP])}{V_{Plasma}} \right) \\ &- V_{Plasma} \cdot \left( \frac{""Rate Law for CETP Mediated TransferTo LDL""(0.001, [HDLC], [CETP])}{V_{Plasma}} \right) \\ &- (0.05 \cdot [HDLC] \cdot [SRB1]) \\ &- V_{Endothelium} \cdot (KinHDL \cdot [HDLC] \cdot M) \\ \frac{d([LDL] \cdot V_{Endothelium})}{dt} &= + V_{Endothelium} \cdot (KinLDL \cdot [LDLC] \cdot M) \\ &- V_{Endothelium} \cdot (KoutLDL \cdot [LDL]) \\ &- V_{Endothelium} \cdot \left( oxLDLConstant \cdot \left( \frac{1 - oxLDLstim\_a}{oxLDLstim\_a + \frac{-4 \cdot oxLDLstim\_b}{oxLDLstim\_c} \cdot ((SUMoxLDL) - oxLDLstim\_c)} \right) \cdot \left( 1 - oxLDLin\_a - \frac{1 - oxLDLin\_a}{oxLDLin\_c \cdot ((HDL) - oxLDLin\_c)} \right) \cdot [LDL] \right) \\ \frac{d([oxLDL] \cdot V_{Endothelium})}{dt} &= + V_{Endothelium} \cdot \left( oxLDLConstant \cdot \left( \frac{1 - oxLDLstim\_a}{oxLDLstim\_a + \frac{-4 \cdot oxLDLstim\_b}{oxLDLstim\_c} \cdot ((SUMoxLDL) - oxLDLstim\_c)} \right) \cdot \left( 1 - oxLDLin\_a - \frac{1 - oxLDLin\_a}{oxLDLin\_c \cdot ((HDL) - oxLDLin\_c)} \right) \cdot [LDL] \right) \\ &- V_{Endothelium} \cdot (KBcleanoxLDL \cdot [Bcells] \cdot [oxLDL]) \\ &- V_{Endothelium} \cdot \left( ForFoamConstant \cdot \left( \frac{1 - ForFoamstim\_a}{ForFoamstim\_a + \frac{-4 \cdot ForFoamstim\_b}{ForFoamstim\_c} \cdot ((SUMForFoam) - ForFoamstim\_c)} \right) \cdot \left( 1 - ForFoaminh\_a - \frac{1 - ForFoaminh\_a}{ForFoaminh\_c \cdot ((TAINF) - ForFoaminh\_c)} \right) \cdot [MP] \cdot [oxLDL] \right) \\ \frac{d([TINF] \cdot V_{Endothelium})}{dt} &= - V_{Endothelium} \cdot (Kdeg\_TINF \cdot [TINF]) \\ &+ V_{Endothelium} \cdot \left( \frac{1 - RecTINFstim\_a}{RecTINFConstant \cdot \left( \frac{-4 \cdot RecTINFstim\_b}{RecTINFstim\_c} \cdot ((SUMRecTINF) - RecTINFstim\_c)} \right)} \cdot \left( 1 - RecTINFinh\_a - \frac{1 - RecTINFinh\_a}{RecTINFinh\_c \cdot ((TAINF) - RecTINFinh\_c)} \right) \right) \\ [SUMRecTAINF] &= [TAINF] + alfa7 \cdot [MP] \\ \frac{d([TAINF] \cdot V_{Endothelium})}{dt} &= - V_{Endothelium} \cdot (Kdeg\_TAINF \cdot [TAINF]) \\ &+ V_{Endothelium} \cdot \left( \frac{1 - RecTAINFstim\_a}{RecTAINFConstant \cdot \left( \frac{-4 \cdot RecTAINFstim\_b}{RecTAINFstim\_c} \cdot ((SUMRecTAINF) - RecTAINFstim\_c)} \right)} \cdot \left( 1 - RecTAINFinh\_a - \frac{1 - RecTAINFinh\_a}{RecTAINFinh\_c \cdot ((TAINF) - RecTAINFinh\_c)} \right) \right) \\ \frac{d([MP] \cdot V_{Endothelium})}{dt} &= - V_{Endothelium} \cdot (Kdeg\_MP \cdot [MP]) \\ &+ V_{Endothelium} \cdot (KRCT \cdot [HDL] \cdot [PLAQUE]) \\ &+ V_{Endothelium} \cdot \left( ActEndConstant \cdot \left( \frac{1 - ActEndstim\_a}{ActEndstim\_a + \frac{-4 \cdot ActEndstim\_b}{ActEndstim\_c} \cdot ((SUMACT\_END) - ActEndstim\_c)} \right) \cdot \left( 1 - ActEndinh\_a - \frac{1 - ActEndinh\_a}{ActEndinh\_c \cdot ((TAINF) - ActEndinh\_c)} \right) \right) \\ &- V_{Endothelium} \cdot \left( ForFoamConstant \cdot \left( \frac{1 - ForFoamstim\_a}{ForFoamstim\_a + \frac{-4 \cdot ForFoamstim\_b}{ForFoamstim\_c} \cdot ((SUMForFoam) - ForFoamstim\_c)} \right) \cdot \left( 1 - ForFoaminh\_a - \frac{1 - ForFoaminh\_a}{ForFoaminh\_c \cdot ((TAINF) - ForFoaminh\_c)} \right) \cdot [MP] \cdot [oxLDL] \right) \\ [SIGMOID\_ACTENDstim] &= ActEndstim\_a + \frac{1 - ActEndstim\_a}{\frac{-4 \cdot ActEndstim\_b}{ActEndstim\_c} \cdot ((SUMACT\_END) - ActEndstim\_c)} \\ [SUMACT\_END] &= [MP] + alfa11 \cdot [oxLDL] + alfa12 \cdot [TINF] + alfa13 \cdot [PLAQUE] \\ \frac{d([PLAQUE] \cdot V_{Endothelium})}{dt} &= + V_{Endothelium} \cdot (Kdeg\_MP \cdot [MP]) \\ &+ V_{Endothelium} \cdot (Kdeg\_TINF \cdot [TINF]) \\ &- V_{Endothelium} \cdot (KBcleanPLAQUE \cdot [Bcells] \cdot [PLAQUE]) \\ &- V_{Endothelium} \cdot (KRCT \cdot [HDL] \cdot [PLAQUE]) \\ &+ V_{Endothelium} \cdot \left( ForFoamConstant \cdot \left( \frac{1 - ForFoamstim\_a}{ForFoamstim\_a + \frac{-4 \cdot ForFoamstim\_b}{ForFoamstim\_c} \cdot ((SUMForFoam) - ForFoamstim\_c)} \right) \cdot \left( 1 - ForFoaminh\_a - \frac{1 - ForFoaminh\_a}{ForFoaminh\_c \cdot ((TAINF) - ForFoaminh\_c)} \right) \cdot [MP] \cdot [oxLDL] \right) \\ [SIGMOID\_ACTENDinh] &= ActEndinh\_a + \frac{1 - ActEndinh\_a}{\frac{-4 \cdot ActEndinh\_b}{ActEndinh\_c} \cdot ((TAINF) - ActEndinh\_c)} \\ \frac{d([Bcells] \cdot V_{Endothelium})}{dt} &= - V_{Endothelium} \cdot (Kdeg\_Bcells \cdot [Bcells]) \\ &- V_{Endothelium} \cdot (KBcleanoxLDL \cdot [Bcells] \cdot [oxLDL]) \\ &- V_{Endothelium} \cdot (KBcleanPLAQUE \cdot [Bcells] \cdot [PLAQUE]) \\ &+ V_{Endothelium} \cdot \left( RecBcellsConstant \cdot \left( \frac{1 - RecBcellsstim\_a}{RecBcellsstim\_a + \frac{-4 \cdot RecBcellsstim\_b}{RecBcellsstim\_c} \cdot ((SUMRecBcells) - RecBcellsstim\_c)} \right) \right) \\ [SUMRecBcells] &= [MP] + alfa8 \cdot [TAINF] + alfa9 \cdot [ACT\_END] + alfa10 \cdot [PLAQUE] \\ [ACT\_END] &= ActEndConstant \cdot [SIGMOID\_ACTENDstim] \cdot (1 - [SIGMOID\_ACTENDinh]) \\ [SUMoxLDL] &= [MP] + alfa1 \cdot [ACT\_END] \\ [SUMForFoam] &= [MP] + alfa2 \cdot [TINF] + alfa3 \cdot [ACT\_END] \\ [SUMRecTINF] &= [MP] + alfa4 \cdot [TINF] + alfa5 \cdot [ACT\_END] + alfa6 \cdot [oxLDL] \\ \frac{d([HDL] \cdot V_{Endothelium})}{dt} &= - V_{Endothelium} \cdot (KoutHDL \cdot [HDL]) \\ &+ V_{Endothelium} \cdot (KinHDL \cdot [HDLC] \cdot M) \\ &- V_{Endothelium} \cdot (KRCT \cdot [HDL] \cdot [PLAQUE]) \end{aligned}$$
