# Supplementary material for: Computationally Modelling Cholesterol Metabolism and Atherosclerosis
Source: MDPI journal article supplement (doi:10.3390/biology12081133), 2023-08-14
Supplement: s1 [file s1]

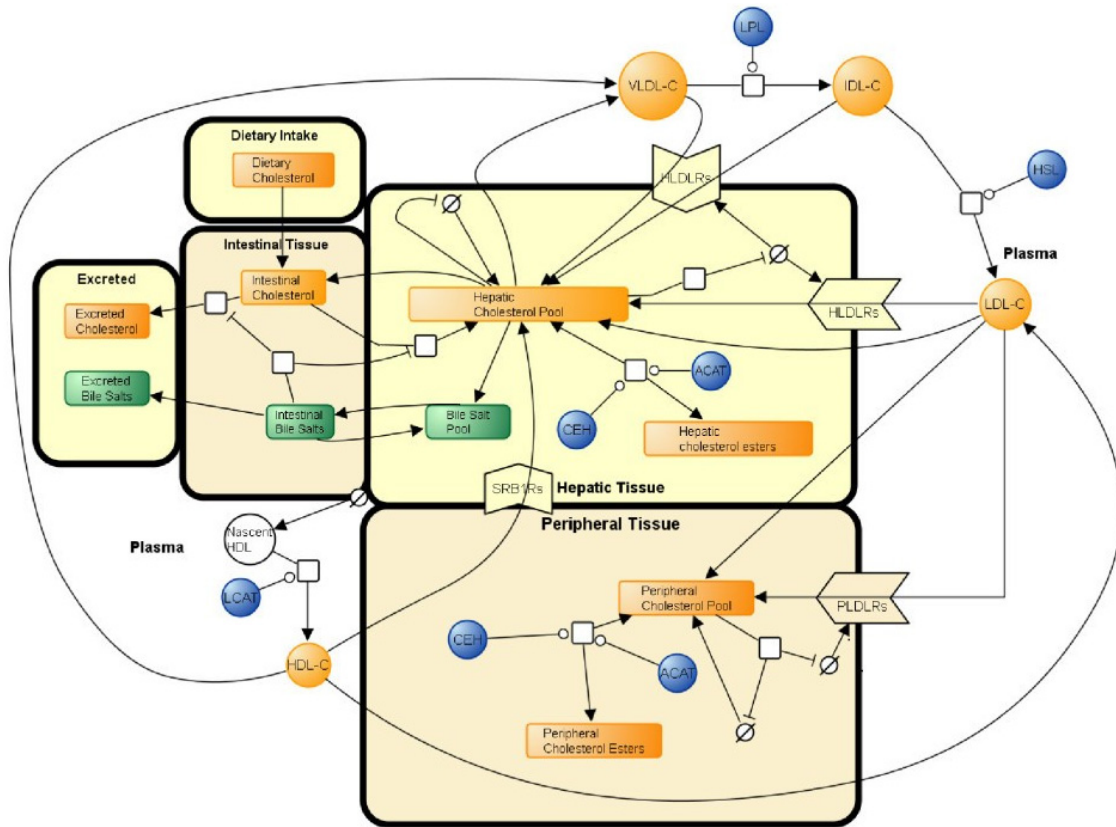

**Figure S1.** SBGN diagram of the Mc Auley et al. (2012) [56] whole-body cholesterol model.

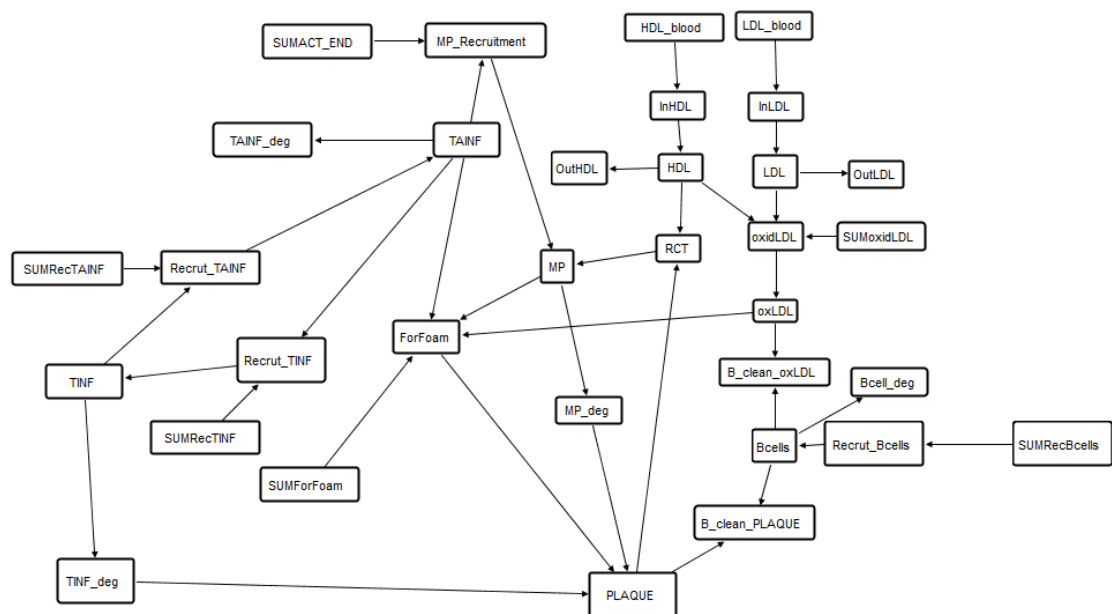

**Figure S2.** BioPAX diagram of the Gomez-Cabrero et al. (2011) [72] model after importation into Vanted.

**Table S1.** Converted global quantity values from week<sup>-1</sup> to day<sup>-1</sup>.

| Global Quantity   | Week <sup>-1</sup> Value | Day <sup>-1</sup> Value |
|-------------------|--------------------------|-------------------------|
| ActEndConstant    | 0.147264                 | 0.021038                |
| ForFoamConstant   | 0.571007                 | 0.081572                |
| KBcleanoxLDL      | 0.150145                 | 0.021449                |
| KBcleanPLAQUE     | 0.431588                 | 0.061655                |
| Kdeg_Bcells       | 0.555978                 | 0.079425                |
| Kdeg_MP           | 0.196692                 | 0.028099                |
| Kdeg_TAINF        | 0.191241                 | 0.027320                |
| Kdeg_TINF         | 0.0882042                | 0.012601                |
| KinHDL            | 1.0614                   | 0.151629                |
| KinLDL            | 4.06157                  | 0.580224                |
| KoutHDL           | 0.375371                 | 0.053624                |
| KoutLDL           | 0.55296                  | 0.078994                |
| KRCT              | 0.302073                 | 0.043153                |
| oxLDLConstant     | 0.28495                  | 0.040707                |
| RecBcellsConstant | 1.14614                  | 0.163734                |
| RecTAINFConstant  | 3.20264                  | 0.457520                |
| RecTINFConstant   | 2.04297                  | 0.291853                |

**Table S2.** Model species.

| #  | Name    | Compartment      | Type      | Unit | Initial Concentration [Unit] |
|----|---------|------------------|-----------|------|------------------------------|
| 1  | DC      | Intake           | fixed     | 1    | 1051                         |
| 2  | IC      | Intestine        | reactions | 1    | 3150                         |
| 3  | ICS     | Intestine        | fixed     | 1    | 0                            |
| 4  | HBS     | HepaticTissue    | reactions | 1    | 400                          |
| 5  | IBS     | Intestine        | reactions | 1    | 467                          |
| 6  | EBS     | Excreted         | fixed     | 1    | 0                            |
| 7  | HFC     | HepaticTissue    | reactions | 1    | 60000                        |
| 8  | EC      | Excreted         | fixed     | 1    | 0                            |
| 9  | INHDLs  | Plasma           | fixed     | 1    | 0                            |
| 10 | NHDL    | Plasma           | reactions | 1    | 100                          |
| 11 | PFC     | PeripheralTissue | reactions | 1    | 57516                        |
| 12 | HCS     | HepaticTissue    | fixed     | 1    | 0                            |
| 13 | HCE     | HepaticTissue    | reactions | 1    | 10000                        |
| 14 | ACAT    | HepaticTissue    | reactions | 1    | 100                          |
| 15 | CEH     | HepaticTissue    | reactions | 1    | 100                          |
| 16 | HNHDLs  | HepaticTissue    | fixed     | 1    | 0                            |
| 17 | VLDLC   | Plasma           | reactions | 1    | 20                           |
| 18 | HLDLRs  | HepaticTissue    | reactions | 1    | 100                          |
| 19 | HLDLRsS | HepaticTissue    | fixed     | 1    | 600                          |
| 20 | HLDLRD  | HepaticTissue    | fixed     | 1    | 0                            |
| 21 | IDLC    | Plasma           | reactions | 1    | 20                           |
| 22 | LPL     | Plasma           | reactions | 1    | 100                          |
| 23 | LDLC    | Plasma           | reactions | 1    | 100                          |
| 24 | HSL     | Plasma           | reactions | 1    | 100                          |
| 25 | PLDLRs  | PeripheralTissue | reactions | 1    | 100                          |
| 26 | PLDLRsS | PeripheralTissue | fixed     | 1    | 575.16                       |
| 27 | PLDLRD  | PeripheralTissue | fixed     | 1    | 0                            |
| 28 | PCE     | PeripheralTissue | reactions | 1    | 9363                         |
| 29 | PSS     | PeripheralTissue | fixed     | 1    | 0                            |
| 30 | HDLC    | Plasma           | reactions | 1    | 45                           |
| 31 | LCAT    | Plasma           | reactions | 1    | 100                          |
| 32 | PCS     | PeripheralTissue | fixed     | 1    | 0                            |
| 33 | CETP    | Plasma           | reactions | 1    | 100                          |

|    |                    |               |            |   |             |
|----|--------------------|---------------|------------|---|-------------|
| 34 | SRB1               | HepaticTissue | reactions  | 1 | 100         |
| 35 | LDL                | Endothelium   | reactions  | 1 | 0           |
| 36 | oxLDL              | Endothelium   | reactions  | 1 | 0           |
| 37 | TINF               | Endothelium   | reactions  | 1 | 0           |
| 38 | SUMRecTAINF        | Endothelium   | assignment | 1 | 0           |
| 39 | TAINF              | Endothelium   | reactions  | 1 | 0           |
| 40 | MP                 | Endothelium   | reactions  | 1 | 0           |
| 41 | SIGMOID_ACTENDstim | Endothelium   | assignment | 1 | 7.69165e-07 |
| 42 | SUMACT_END         | Endothelium   | assignment | 1 | 0           |
| 43 | PLAQUE             | Endothelium   | reactions  | 1 | 0           |
| 44 | SIGMOID_ACTENDinh  | Endothelium   | assignment | 1 | 0.000423556 |
| 45 | Bcells             | Endothelium   | reactions  | 1 | 0           |
| 46 | SUMRecBcells       | Endothelium   | assignment | 1 | 3.82182e-08 |
| 47 | ACT_END            | Endothelium   | assignment | 1 | 1.61748e-08 |
| 48 | SUMoxidLDL         | Endothelium   | assignment | 1 | 2.51464e-08 |
| 49 | SUMForFoam         | Endothelium   | assignment | 1 | 1.09875e-08 |
| 50 | SUMRecTINF         | Endothelium   | assignment | 1 | 2.96687e-08 |
| 51 | HDL                | Endothelium   | reactions  | 1 | 0           |

**Table S3.** Model reactions.

| #  | Name                                     | Reaction                          |
|----|------------------------------------------|-----------------------------------|
| 1  | Ingestion                                | DC -> IC; DC                      |
| 2  | Intestinal Cholesterol Synthesis         | ICS -> IC; IC                     |
| 3  | Bile Salt Release                        | HBS -> IBS; HBS                   |
| 4  | Bile Salt Return                         | IBS -> HBS; IBS                   |
| 5  | Bile Salt Excretion                      | IBS -> EBS; IBS                   |
| 6  | Bile Salt Synthesis                      | HFC -> HBS; HBS HFC               |
| 7  | Cholesterol Absorption                   | IC -> HFC; IBS IC                 |
| 8  | Cholesterol Excretion                    | IC -> EC; IBS IC                  |
| 9  | Intestinal Nascent HDL Synthesis         | INHDLs -> NHDL; PFC               |
| 10 | Biliary Cholesterol Release              | HFC -> IC; HFC                    |
| 11 | Hepatic Cholesterol Synthesis            | HCS -> HFC; HFC                   |
| 12 | Hepatic Cholesterol Storage              | HFC -> HCE; ACAT HFC              |
| 13 | Release of Stored Cholesterol            | HCE -> HFC; CEH HCE               |
| 14 | Hepatic Nascent HDL Synthesis            | HNHDLs -> NHDL; PFC               |
| 15 | VLDL Cholesterol Formation               | HFC -> VLDLC; HFC                 |
| 16 | Hepatic LDLR Synthesis                   | HLDLRsS -> HLDLRs; HLDLRsS HFC    |
| 17 | Hepatic LDL Receptor Degradation         | HLDLRs -> HLDLRD; HLDLRs          |
| 18 | VLDL Cholesterol ReUptake                | VLDLC -> HFC; VLDLC               |
| 19 | IDL Cholesterol Formation                | VLDLC -> IDLC; VLDLC LPL          |
| 20 | IDL Cholesterol ReUptake                 | IDLC -> HFC; IDLC                 |
| 21 | LDL Cholesterol Formation                | IDLC -> LDLC; HSL IDLC            |
| 22 | Receptor Dependent Hepatic Uptake        | LDLC -> HFC; HLDLRs LDLC          |
| 23 | Receptor Independent Hepatic Uptake      | LDLC -> HFC; LDLC                 |
| 24 | Receptor Dependent Peripheral Uptake     | LDLC -> PFC; PLDLRs LDLC          |
| 25 | Receptor Independent Peripheral Uptake   | LDLC -> PFC; LDLC                 |
| 26 | Peripheral LDLR Synthesis                | PLDLRsS -> PLDLRs; PFC PLDLRsS    |
| 27 | Peripheral LDL Receptor Degradation      | PLDLRs -> PLDLRD; PLDLRs          |
| 28 | Peripheral Cholesterol Storage           | PFC -> PCE; ACAT PFC              |
| 29 | Release of Stored Peripheral Cholesterol | PCE -> PFC; CEH PCE               |
| 30 | Peripheral Steroid Production            | PFC -> PSS; PFC                   |
| 31 | HDL Cholesterol Formation                | PFC + NHDL -> HDLC; LCAT PFC NHDL |
| 32 | Peripheral Cholesterol Synthesis         | PCS -> PFC; PFC                   |
| 33 | CETP Mediated Transfer To VLDL           | HDLC -> VLDLC; CETP HDLC          |

|    |                               |                                        |
|----|-------------------------------|----------------------------------------|
| 34 | CETP Mediated TransferTo LDL  | HDLC -> LDLC; CETP HDLC                |
| 35 | Reverse Cholesterol Transport | HDLC -> HFC; SRB1 HDLC                 |
| 36 | Bcell_deg                     | Bcells ->                              |
| 37 | InLDL                         | LDLC -> LDL                            |
| 38 | OutLDL                        | LDL ->                                 |
| 39 | MP_deg                        | MP -> PLAQUE                           |
| 40 | OutHDL                        | HDL ->                                 |
| 41 | TAINF_deg                     | TAINF ->                               |
| 42 | oxidLDL                       | LDL -> oxLDL; SUMoxidLDL HDL           |
| 43 | TINF_deg                      | TINF -> PLAQUE                         |
| 44 | InHDL                         | HDLC -> HDL                            |
| 45 | B_clean_oxLDL                 | Bcells + oxLDL ->                      |
| 46 | B_clean_PLAQUE                | Bcells + PLAQUE ->                     |
| 47 | RCT[merge]                    | HDL + PLAQUE -> MP                     |
| 48 | Recrut_TINF                   | -> TINF; SUMRecTINF TAINF              |
| 49 | Recrut_TAINF                  | -> TAINF; SUMRecTAINF TINF             |
| 50 | Recrut_Bcells                 | -> Bcells; SUMRecBcells                |
| 51 | MP_Recruitment                | -> MP; SUMACT_END TAINF                |
| 52 | ForFoam[merge]                | MP + oxLDL -> PLAQUE; SUMForFoam TAINF |

**Table S4.** Impact of statin, sterol, and combination therapy on LDL-C.

| Time |      | LDL-C (mg/dL) |         |         |             |
|------|------|---------------|---------|---------|-------------|
| Day  | Week | Baseline      | Statin  | Sterol  | Combination |
| 0    | 0    | 100.000       | 100.000 | 100.000 | 100.000     |
| 7    | 1    | 136.970       | 133.008 | 133.331 | 129.405     |
| 14   | 2    | 139.514       | 131.846 | 132.816 | 125.332     |
| 21   | 3    | 141.949       | 130.889 | 132.520 | 121.907     |
| 28   | 4    | 144.256       | 130.081 | 132.329 | 118.963     |
| 35   | 5    | 146.449       | 129.403 | 132.220 | 116.427     |
| 42   | 6    | 148.540       | 128.840 | 132.178 | 114.241     |
| 49   | 7    | 150.537       | 128.376 | 132.192 | 112.351     |
| 56   | 8    | 152.449       | 127.999 | 132.252 | 110.715     |
| 63   | 9    | 154.281       | 127.697 | 132.349 | 109.296     |
| 70   | 10   | 156.038       | 127.461 | 132.476 | 108.062     |
| 77   | 11   | 157.725       | 127.282 | 132.626 | 106.986     |
| 84   | 12   | 159.344       | 127.151 | 132.795 | 106.046     |
| 91   | 13   | 160.899       | 127.062 | 132.979 | 105.223     |
| 98   | 14   | 162.392       | 127.008 | 133.173 | 104.501     |
| 105  | 15   | 163.825       | 126.986 | 133.376 | 103.867     |
| 112  | 16   | 165.200       | 126.989 | 133.583 | 103.307     |
| 119  | 17   | 166.520       | 127.014 | 133.793 | 102.813     |
| 126  | 18   | 167.786       | 127.058 | 134.005 | 102.377     |
| 133  | 19   | 169.000       | 127.116 | 134.216 | 101.990     |
| 140  | 20   | 170.163       | 127.188 | 134.426 | 101.647     |
| 147  | 21   | 171.276       | 127.269 | 134.633 | 101.341     |
| 154  | 22   | 172.342       | 127.359 | 134.837 | 101.070     |
| 161  | 23   | 173.362       | 127.455 | 135.036 | 100.828     |
| 168  | 24   | 174.337       | 127.557 | 135.231 | 100.612     |
| 175  | 25   | 175.269       | 127.661 | 135.421 | 100.419     |
| 182  | 26   | 176.159       | 127.769 | 135.605 | 100.246     |
| 189  | 27   | 177.008       | 127.877 | 135.783 | 100.091     |
| 196  | 28   | 177.818       | 127.987 | 135.955 | 99.953      |
| 203  | 29   | 178.591       | 128.096 | 136.121 | 99.828      |
| 210  | 30   | 179.326       | 128.204 | 136.282 | 99.717      |
| 217  | 31   | 180.027       | 128.311 | 136.435 | 99.616      |
| 224  | 32   | 180.694       | 128.417 | 136.583 | 99.526      |
| 231  | 33   | 181.328       | 128.520 | 136.725 | 99.445      |
| 238  | 34   | 181.931       | 128.621 | 136.860 | 99.372      |
| 245  | 35   | 182.504       | 128.719 | 136.990 | 99.307      |
| 252  | 36   | 183.049       | 128.815 | 137.114 | 99.247      |
| 259  | 37   | 183.565       | 128.908 | 137.232 | 99.194      |
| 266  | 38   | 184.055       | 128.997 | 137.345 | 99.146      |
| 273  | 39   | 184.520       | 129.084 | 137.452 | 99.103      |
| 280  | 40   | 184.961       | 129.167 | 137.554 | 99.063      |
| 287  | 41   | 185.378       | 129.247 | 137.651 | 99.028      |

|     |    |         |         |         |        |
|-----|----|---------|---------|---------|--------|
| 294 | 42 | 185.773 | 129.324 | 137.743 | 98.996 |
| 301 | 43 | 186.148 | 129.398 | 137.831 | 98.967 |
| 308 | 44 | 186.502 | 129.469 | 137.914 | 98.941 |
| 315 | 45 | 186.837 | 129.536 | 137.992 | 98.917 |
| 322 | 46 | 187.154 | 129.601 | 138.067 | 98.896 |
| 329 | 47 | 187.453 | 129.663 | 138.137 | 98.877 |
| 336 | 48 | 187.736 | 129.721 | 138.204 | 98.859 |
| 343 | 49 | 188.003 | 129.777 | 138.267 | 98.844 |
| 350 | 50 | 188.255 | 129.830 | 138.326 | 98.829 |
| 357 | 51 | 188.493 | 129.881 | 138.382 | 98.816 |
| 364 | 52 | 188.718 | 129.929 | 138.435 | 98.804 |
| 365 | 52 | 188.749 | 129.935 | 138.443 | 98.803 |

---



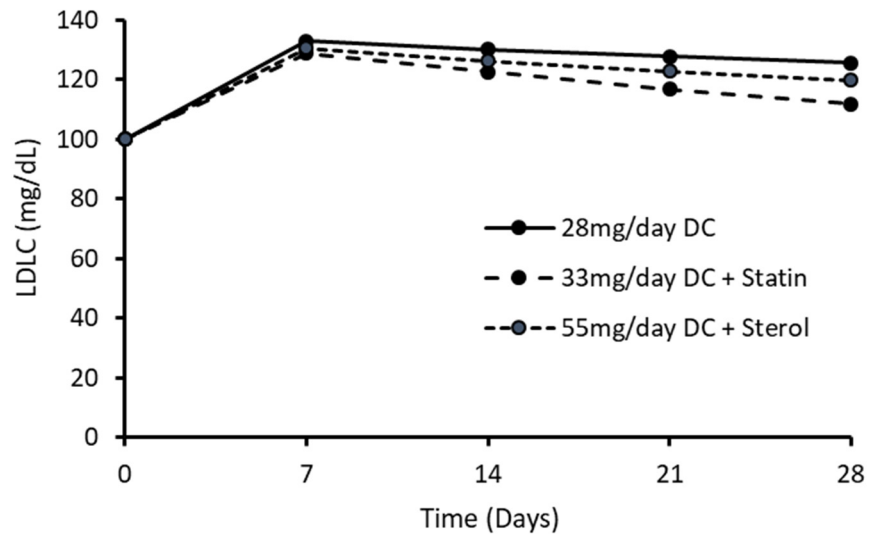

**Figure S3.** Impact of dietary cholesterol in tandem with pharmaceutical interventions.
